# Supplementary material
Source: publisher site journal article supplement (http://www.scielo.br/pdf/rmat/v22s1/1517-7076-rmat-22-suppl-e11933.pdf)
Supplement: Supplementary file 1 [file 1517-7076-rmat-22-suppl-e11933.pdf]

## Influência do nitrogênio na resistência à erosão por cavitação do aço inoxidável martensítico

### Influence of nitrogen on the cavitation erosion resistance of martensitic stainless steel

Ricardo Almeida Maftoum<sup>1</sup>, Paulo César Borges<sup>1</sup>,  
Cleide Maria Marquize<sup>2</sup>

<sup>1</sup> UTFPR/DAMEC, Grupo de Materiais Tribologia e Superfícies, Av. Monsenhor Ivo Zanlorenzi, 5015, 81280-350-Curitiba, PR. e-mail: ricmaftoum@hotmail.com; pborges@utfpr.edu.br

<sup>2</sup> UFSC, Departamento de Mecânica, Florianópolis, SC  
e-mail: cleide.marquize@ufsc.br

---

#### RESUMO

A adição de nitrogênio em aços inoxidáveis tem sido estudada como alternativa à produção de materiais que combinem boas propriedades mecânicas, resistência à corrosão e ao desgaste. Alguns métodos de enriquecimento de nitrogênio se respaldam em processos difusivos como nitretação a baixa e alta temperatura. Dentre estes, a nitretação seguida do Tratamento Térmico de Solubilização (NTTS), que consiste na realização de nitretação, com o objetivo de inserir o nitrogênio no material, seguido de um tratamento térmico de solubilização, que dissolve os nitretos, fazendo com que o nitrogênio se apresente em solução sólida intersticial. Neste trabalho aplicou-se o NTTS ao aço inoxidável martensítico ASTM CA-6NM. A nitretação a plasma foi realizada a uma temperatura de 630 °C por 3 horas e a solubilização em três diferentes condições (1200 °C por 30 minutos, 1200 °C por 1 hora e 1100 °C por 1 hora). As amostras foram analisadas através de difração de raios-x, microscopia ótica e medições de microdureza na região transversal da amostra. Foi verificado um aumento da dureza superficial dos aços CA-6NM, porém não foi observada a estabilização da fase austenita na região superficial mais rica em nitrogênio. O ensaio de cavitação foi realizado conforme norma ASTM G32/09, porém utilizando o método indireto, no qual a amostra não é fixada diretamente no sonotrodo. A região cavitada das amostras foi caracterizada através de microscopia eletrônica de varredura. Foi verificado que as amostras tratadas obtiveram menores taxas de erosão, e que houve diferença entre as diferentes condições de solubilização.

**Palavras chaves:** nitretação a plasma, solubilização, SHTPN, erosão por cavitação, aço inoxidável martensítico.

---

#### ABSTRACT

The addition of nitrogen on stainless steels has been studied as an alternative to the production of materials which combine good mechanical properties, corrosion and wear resistance. Some nitrogen enrichment methods are supported by diffusive processes such as low and high temperatures nitriding. Among these processes, it is worth mentioning the Solution Heat Treatment after Plasma Nitriding (SHTPN), which consists in performing plasma nitriding, with the purpose of adding nitrogen to the material, followed by a solubilization heat treatment, which dissolves the nitrates, causing the nitrogen to appear in interstitial solid solution. In this paper, the SHTPN technique was applied to ASTM CA-6NM martensitic stainless steel. Plasma nitriding was performed at 630 °C for 3 hours and three different solubilization conditions were used (1200 °C for 30 minutes, 1200 °C for 1 hour e 1100 °C for 1 hour). The samples were analyzed through x-ray diffraction, optical microscopy and microhardness measurements in the transverse section of the sample. All samples had an increase in surface hardness of ASTM CA-6NM steel, and no stabilization of the austenite phase was observed in the surface area richer in nitrogen. The cavitation experiment was conducted according to the ASTM G32/09 standard, using the indirect method, in which the sample is not directly fixed on the vibrating

horn. The cavitated area of the samples was analyzed by scanning electron microscopy. The treatment increased cavitation erosion resistance of all samples and differences were observed among the various solubilization conditions.

**Keywords:** plasma nitriding, solubilization, SHTPN, cavitation, martensitic stainless steel.

## 1. INTRODUÇÃO

A resistência à cavitação-erosão de aços inoxidáveis vem sendo estudado por diversos pesquisadores. A adição de nitrogênio promove o aumento simultâneo da resistência mecânica, resistência à fadiga, resistência à corrosão e ao desgaste. Além disto, pode também melhorar a tenacidade, estabilizar a fase austenita, melhorar a capacidade de trabalho a frio e aumentar a resistência ao envelhecimento [1]. As principais alterações nas propriedades mecânicas estão associadas ao aumento da componente metálica da ligação interatômica promovida pela adição de nitrogênio, bem como a promoção da ordem de curto alcance dos átomos em contraste ao clustering e deslocamento planar das discordâncias promovido pelos átomos de carbono [2]. As principais justificativas para melhora na resistência à corrosão estão associadas a: formação de  $\text{NH}_4^+$  na solução, com consequente aumento do pH do meio; teores elevados de nitrogênio no filme estabiliza e aumenta a resistência ao ataque pelo íon  $\text{Cl}^-$  e a produção de íons de nitrato melhora a resistência à corrosão por pit [3].

Em função disto, vários métodos foram desenvolvidos para se adicionar nitrogênio em aços na fase sólida. Entre estes métodos está o HTGN - High Temperature Gas Nitriding, que possibilita a formação de camadas espessas (tipicamente maiores do que 0,5 mm) enriquecidas com nitrogênio. SUNG [4], processou o aço inoxidável ferrítico AISI 430 por meio do HTGN na temperatura de 1100 °C por 10 h e obteve camadas da ordem de 250  $\mu\text{m}$ . Na pesquisa desenvolvida por DOS SANTOS, [4], aplicou-se o HTGN ao aço inoxidável austenítico AISI 304L por 6 h na temperatura de 1150 °C, obtendo camada com espessuras da ordem de 500  $\mu\text{m}$ . Um processo alternativo ao HTGN é denominado *Solution Heat Treatment after Plasma Nitriding*. O SHTPN consiste de duas etapas. Na primeira, é utilizado a nitretação a plasma, com o objetivo de se inserir nitrogênio na superfície do aço [6]. A segunda etapa consiste na realização do tratamento de solubilização, com o objetivo de dissolver os nitretos presentes no aço após a nitretação a plasma, de modo a se obter espessas camadas de aço enriquecido com nitrogênio em solução sólida, sem a presença de nitretos [7]. O SHTPN alia a boa produtividade da nitretação a plasma com a solubilização, sendo relativamente rápido quando comparado ao HTGN, visto que a nitretação prévia ativa a superfície criando um elevado gradiente de concentração de nitrogênio para a posterior solubilização.

BORGES E ROCHA [8] estudaram o efeito do SHTPN na resistência à corrosão do aço inoxidável endurecível por precipitação 15-5 PH. Neste trabalho obteve-se a estabilização da fase austenítica na superfície, devido ao alto teor de nitrogênio e aumento da dureza da camada martensítica na interface com o substrato (de 350 para 465 HV). A camada modificada apresentou espessura de até 700  $\mu\text{m}$ . Verificou-se também que a introdução de nitrogênio melhorou a resistência à corrosão em especial elevou o potencial de nucleação de pite.

Entre os benefícios da adição do nitrogênio, está a melhora na resistência à erosão por cavitação dos aços [5]. Cavitação é um fenômeno hidrodinâmico que ocorre quando um líquido atinge grandes velocidades, resultando em uma diminuição local da pressão que, ao atingir um valor de pressão crítica ( $P_{cr}$ ) para uma dada temperatura, possibilita a nucleação e crescimento de bolhas ou cavidades. Essas bolhas são então carregadas pelo fluxo de líquido e, quando atingem regiões de maior pressão se tornam instáveis e colapsam violentamente, causando danos a superfícies que estejam próximas destas implosões. A erosão por cavitação é um problema muito grave, causando grandes danos em equipamentos hidráulicos, como turbinas, bombas, hélices de barcos e navios, tubos de trocadores de calor, válvulas, e qualquer outra estrutura em contato com líquidos em alta velocidade sujeitos a mudanças de pressão [9].

MILLS [10], DOS SANTOS [5], BREGLIOZZI [11], E GRAJALES [12] reportaram que a adição do nitrogênio em solução sólida tem o efeito de melhorar a resistência à erosão por cavitação de aços inoxidáveis. DOS SANTOS [5], BREGLIOZZI [11], E GRAJALES [12] estudaram o efeito da nitretação a alta temperatura (superior a 1100 °C) na resistência à erosão por cavitação do aço inoxidável por cavitação do aço inoxidável austenítico AISI 304L e concluíram que o HTGN melhora significativamente o desempenho.

O presente trabalho teve por objetivo determinar a influência da introdução do nitrogênio em solução sólida inserido utilizando por meio do processo SHTPN (Solution Heat Treatment after Plasma Nitriding) na resistência à erosão por cavitação do aço inoxidável martensítico.

## 2. MATERIAIS E MÉTODOS

### 2.1 Material

Amostras do aço CA6NM com 30x25x6 mm foram cortadas a partir de um bloco de 190x53x35 mm na condição temperado e revenido e posteriormente retificadas. A composição química do material, obtida pela técnica de espectrometria de emissão óptica, está apresentada na Tabela 1.

**Tabela 1:** Comparação entre a composição química da norma ASTM A 743 (CA-6NM) com a encontrada pela análise da amostra.

| Elementos           | C (%p/p)  | Mn (%p/p) | Si (%p/p) | Cr (%p/p) | Ni (%p/p) | Mo (%p/p) | P (%p/p) | S (%p/p) |
|---------------------|-----------|-----------|-----------|-----------|-----------|-----------|----------|----------|
| ASTM A 743 - CA-6NM | 0,060máx. | 1,00máx.  | 1,00máx   | 11,5-14,0 | 3,5-4,5   | 0,4-1,0   | 0,04máx  | 0,03máx  |
| Medido              | 0,032     | 0,630     | 0,522     | 12,25     | 4,42      | 0,430     | 0,024    | 0,015    |

### 2.2 Tratamento Térmico de Solubilização após Nitretação

Antes de serem nitretadas, as amostras foram limpas em banho de álcool etílico utilizando um equipamento ultrassônico durante uma hora, para a remoção de gordura, óxidos e outros contaminantes que possam estar presentes na superfície da amostra. A nitretação foi realizada em um reator com 297 mm de diâmetro e 300 mm de altura. Primeiro as amostras são posicionadas no cátodo do reator a plasma, em forma de roseta. A seguir, é feito vácuo no reator a uma pressão de  $10^{-3}$  Torr. Depois de atingido o vácuo, as amostras foram submetidas a um ciclo de limpeza por sputtering, que é realizado com o gás  $H_2$  em uma pressão de seis Torr e temperatura de 300 °C por 60 min. Neste ciclo ocorre a remoção de possíveis óxidos ainda existentes e a remoção da camada externa passiva característica dos aços inoxidáveis. Por último, as amostras foram nitretadas nas condições apresentadas na Tabela 2, de forma a garantir a introdução de uma grande quantidade de nitrogênio.

**Tabela 2:** Condições do tratamento de nitretação.

|                       |                                                 |
|-----------------------|-------------------------------------------------|
| <b>TEMPERATURA</b>    | <b>630 °C</b>                                   |
| <b>TEMPO</b>          | <b>3 H</b>                                      |
| <b>MISTURA GASOSA</b> | <b>20% H<sub>2</sub> E 80% DE N<sub>2</sub></b> |
| <b>PRESSÃO</b>        | <b>10 TORR</b>                                  |

Após a realização da nitretação, as amostras foram solubilizadas em três condições diferentes. Para evitar oxidação, foi utilizado um forno tubular com atmosfera de argônio. As três condições de solubilização foram de 1100 °C por uma hora (identificada como NS1), 1200 °C por meia hora (NS2) e 1200 °C por uma hora (NS3). O diagrama esquemático do ciclo térmico de SHTPN pode ser visualizado na Figura 1.

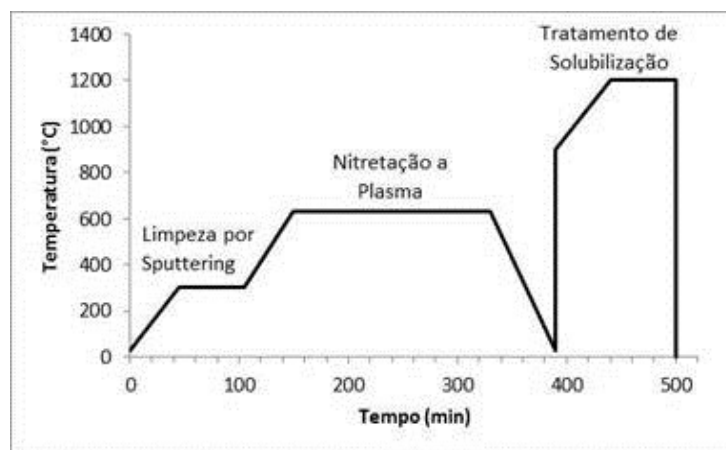

**Figura 1:** Ciclo térmico do tratamento do tratamento de SHTPN.

### 2.3 Ensaio de Cavitação

O ensaio de cavitação foi realizado utilizando equipamento vibratório, seguindo a norma ASTM G32/85 - “ASTM Standard Test Method for Cavitation Erosion Using Vibratory Apparatus” [9], porém, foi utilizado o método indireto. Neste método, ao invés da amostra ficar diretamente no transdutor, fica a uma distância de 0,5 mm da ponta de sacrifício do transdutor, que vibra dentro da água destilada, causando a cavitação.

A frequência utilizada foi  $20 \text{ kHz} \pm 0,2 \text{ Hz}$  com amplitude de  $50 \text{ }\mu\text{m}$ . A ponta de sacrifício foi usinada em aço inoxidável AISI 304 e polida até uma rugosidade inicial da superfície de ensaio de  $1 \text{ }\mu\text{m}$ . A temperatura da água destilada foi controlada na temperatura de  $21 \pm 1 \text{ }^\circ\text{C}$  e as amostras foram imersas numa profundidade de 10 mm.

### 2.4 Caracterização

A microestrutura das amostras antes e após os tratamentos foi examinada por microscopia ótica. A preparação das seções transversais das amostras seguiu as etapas tradicionais de preparação metalográfica, envolvendo corte, lixamento e finalizando com o polimento em diamante  $0,25 \text{ }\mu\text{m}$ . A microestrutura foi revelada utilizando reagente Villela.

O perfil de dureza em função da profundidade foi determinado em microdurômetro Vickers com carga de 0,1 N. Cada ponto do perfil consiste na média de três medições.

A difração de raios X foi aplicada para a identificação das fases presentes nas amostras resultantes do processo SHTPN. As análises foram realizadas em um difratômetro Philips X’Pert utilizando-se radiação incidente  $\text{CuK-}\alpha$  ( $\lambda = 1,54060 \text{ \AA}$ ), corrente de 30 mA e tensão de 40 kV, numa faixa de  $30$  a  $100^\circ$  ( $2\theta$ ) a uma velocidade de varredura de  $0,05^\circ/\text{s}$ .

O desempenho nos ensaios de erosão cavitação foi determinado por meio da medição da perda de massa, utilizando balança eletrônica com precisão de 0,1 mg. As superfícies erodidas por cavitação também foram analisadas por meio de microscopia eletrônica de varredura. Todos os ensaios foram realizados em triplicata.

## 3. RESULTADOS E DISCUSSÃO

### 3.1 Nitretação

Na Figura 2, é possível visualizar o perfil de microdureza sobreposto a microestrutura superficial do aço CA-6NM na condição nitretada. É possível observar que a camada nitretada é composta por duas regiões, uma mais escura, camada de compostos com espessura de aproximadamente  $40 \text{ }\mu\text{m}$  (região *a*) e outra mais clara, camada de difusão (região *b*). A espessura total é da ordem de  $130 \text{ }\mu\text{m}$ . A região *c* corresponde a região de transição da camada nitretada para o substrato. Na região *a*, próxima da superfície, a dureza atinge seu valor máximo, enquanto que na região *b*, a dureza apresenta valores médios próximos de  $800 \text{ HV}_{0,1}$ , caindo para valores próximos da condição não tratada na região *c*.

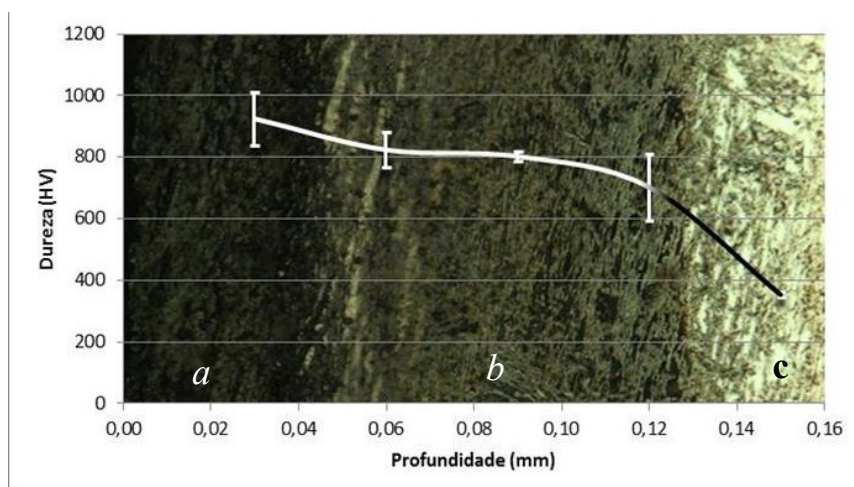

Figura 2: Perfil de microdureza na condição nitretada plotado sobre a microestrutura correspondente.

Na Figura 3 é possível observar o difratograma para a superfície da amostra na condição nitretada. Os picos encontrados são provenientes da  $\text{Fe}_4\text{N}$  ( $\gamma'$ ) e fase  $\text{CrN}$ . O pico de maior intensidade corresponde a fase  $\gamma'$  indicando predominância desta fase. Estes resultados estão de acordo com os resultados encontrados por BORGES e ROCHA [8].

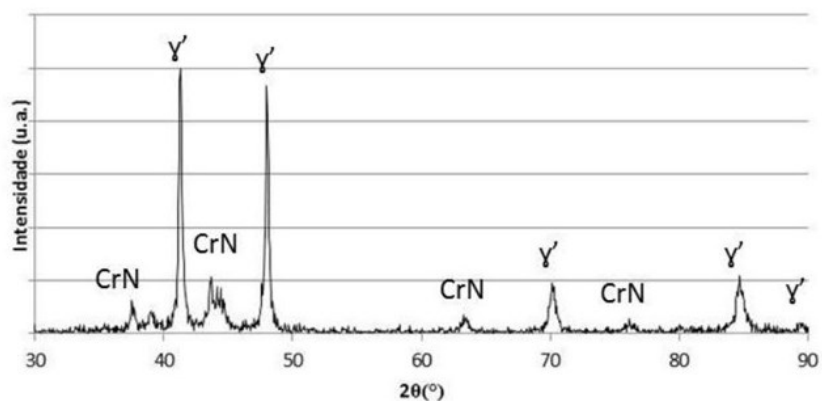

Figura 3: Difratograma da amostra na condição nitretada.

### 3.2 Solubilização

Após a solubilização removeu por retifica aproximadamente 180  $\mu\text{m}$  de forma a garantir uma superfície plana, isenta de defeitos e óxidos. Na

Figura 4 é possível visualizar a microestrutura predominantemente martensítica do aço CA6NM antes e após tratamento nas condições NS1, NS2 e NS3. A microestrutura são predominantemente martensíticas, com algumas regiões austeníticas (região clara entre as agulhas de martensita). Contudo verifica-se um aumento do tamanho das ripas de martensita com o aumento do tempo e temperatura de austenitização.

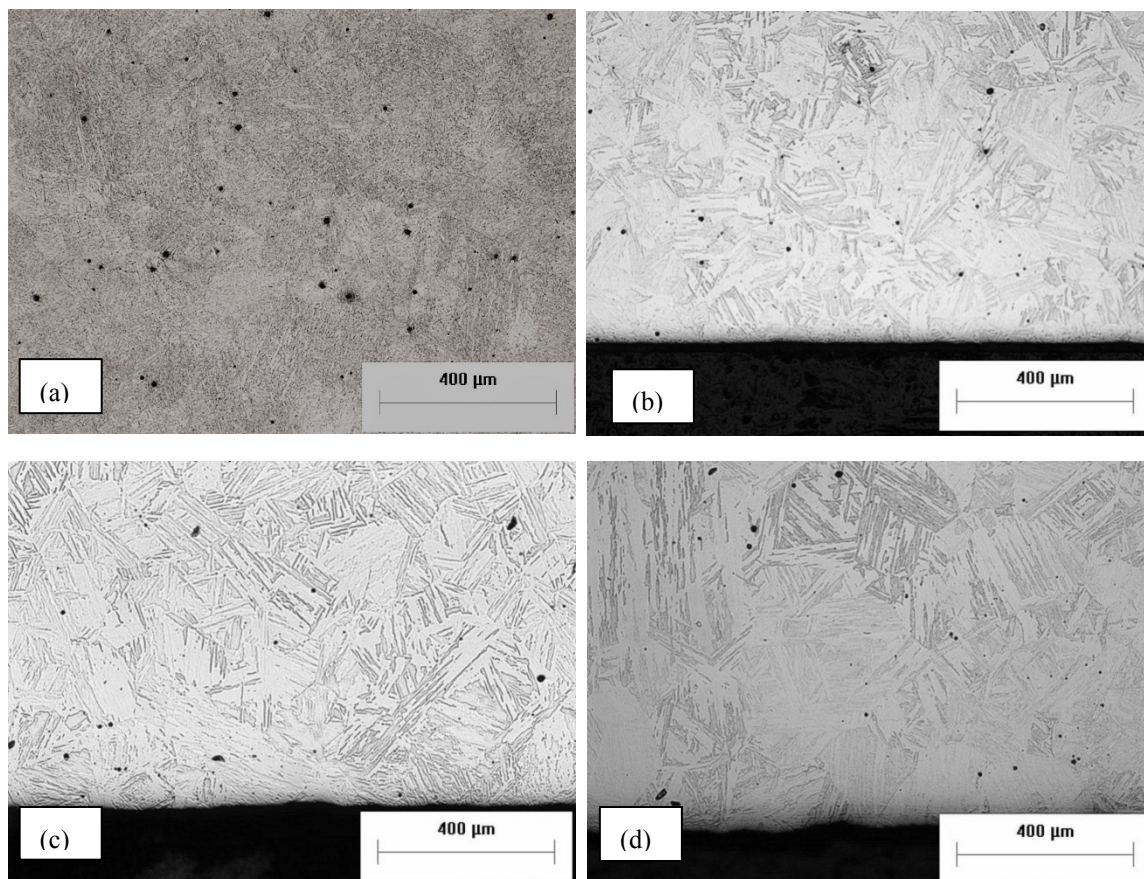

Figura 4: Micrografia do aço CA6NM na condição de fornecimento (a) e nas condições NS1 (b), NS2 (c) e NS3 (d).

A Figura 5 apresenta o perfil de dureza das amostras NS1, NS2 e NS3 em função da profundidade. Como o nitrogênio passa para solução sólida intersticial durante o tratamento de solubilização, ele possui efeito similar ao do carbono na estrutura martensítica, ou seja, aumenta a temperabilidade, a dureza da martensita resultante e se em valores muito alto, aumenta a quantidade de austenita retida.

A análise do perfil de dureza apresentado na Figura 05 permite verificar que a dureza da superfície diminui com o aumento do tempo e da temperatura de solubilização. Isto ocorre devido a maior difusão, com consequente redução do perfil de nitrogênio da condição NS1 para NS2 e NS3. Comparando a condição NS1 com a NS2 verifica-se que o perfil de dureza para as profundidades de 20 a 300  $\mu\text{m}$  é menor para a condição NS2. Quanto a profundidade de endurecimento, conforme esperado, verifica-se que o aumento do tempo e da temperatura produz um acréscimo na profundidade endurecida. A dureza no aço NS3 manteve-se acima de 500 HV até a profundidade de aproximadamente 500  $\mu\text{m}$ , enquanto na condição NS1 a profundidade para a mesma dureza é de aproximadamente 400  $\mu\text{m}$ . Contudo o perfil de dureza para a condição NS3 apresenta um patamar para a dureza de aproximadamente 550 HV. Em termos de valores máximos de dureza atingidos, o aço NS1 obteve  $620 \pm 31 \text{ HV}_{0,1}$  a 0,10mm de profundidade, enquanto o aço NS2 obteve  $612 \pm 11 \text{ HV}_{0,1}$  a 0,033 mm de profundidade e o aço NS3 obteve  $579 \pm 50 \text{ HV}_{0,1}$  a 0,067 mm de profundidade.

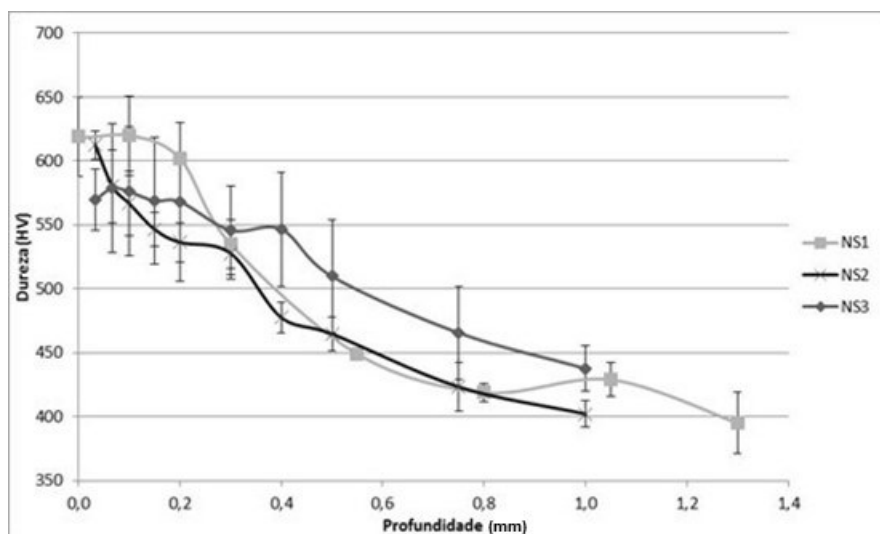

**Figura 5:** Perfis de microdureza do aço CA-6NM nas condições NS1, NS2 e NS3.

Na Figura 6 é possível visualizar o difratograma de Raios-X, do aço CA6NM produzido nas condições NS1, NS2 e NS3. É possível observar que os picos difratados correspondem a fase martensítica representado pela letra alfa e picos da fase austenítica representados pela letra gama. A análise da intensidade do pico da fase austenítica difratado em  $43,4^\circ$  ( $2\theta$ ) permite verificar que as amostras NS1 e NS2 apresentam quantidades distintas de austenita retida. Verifica-se aumento da intensidade do pico difratado em  $43,4^\circ$ , o que indica aumento da quantidade da fase austenita com o aumento do tempo de tratamento. Este efeito deve ocorrer devido ao aumento da quantidade de nitrogênio dissolvida na austenita, bem como do aumento do tamanho de grão da austenita que ocorre com o aumento da temperatura de solubilização entre as condições NS1 e NS2. Entretanto verificou-se que para a condição NS3 solubilizada na mesma temperatura da condição NS2, não apresenta picos referentes a fase austenita. Acredita-se que o aumento do tempo de 30 min para 60 min promoveu maior difusão e consequentemente o esgotamento de nitrogênio na superfície, com consequente redução do perfil de concentração, ou seja, redução do teor de nitrogênio próximo a superfície e aumento para profundidades maiores.

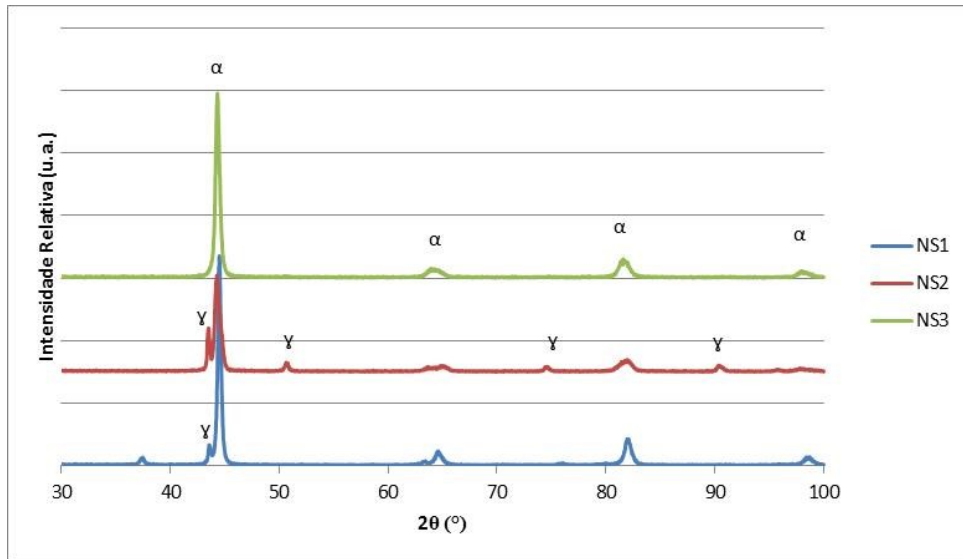

Figura 6: Difratograma de Raios-X, do aço CA6NM para as condições NS1 a NS3.

### 3.3 Resistência à erosão por cavitação

Na Figura 7 visualiza-se a perda de massa pelo tempo de cavitação obtida para o aço CA6NM nas diferentes condições de SHTPN. A análise dos dados permite verificar que a condição não tratada apresentou a maior perda de massa. Percebe-se também que houve uma melhora significativa na resistência à erosão por cavitação com a realização do SHTPN em qualquer uma das condições estudadas, sendo que o melhor desempenho, ou seja, a menor perda de massa ocorreu para a condição NS1, e a pior para a condição NS3. O aço NS2 apresentou perda de massa similar à do aço NS1 até 5 h de ensaio (300 min), a partir do qual sua perda de massa torna-se maior. Este comportamento pode ser explicado com a ajuda dos perfis de dureza apresentados na Figura 5.

A dureza superficial é similar para as condições NS1 e NS2, indicando quantidades de nitrogênio dissolvido bastante próximas, representado pelos tempos de incubação próximos. Porém, na condição NS2 o pico de dureza é bastante estreito, diferente da condição NS1 que apresenta um patamar de dureza maior do que 600 HV até a profundidade de 200  $\mu\text{m}$ . Conforme observado na Figura 6, a condição NS2 também apresenta uma maior quantidade da fase austenita, o que também está de acordo com a redução de dureza para a amostra NS2 quando comparado com a condição NS1. Supõe-se que quando o aço NS2 perder material devido à erosão por cavitação, rapidamente chega-se a uma região com menos dureza e provavelmente com mais austenita retida, e conseqüentemente menor resistência à erosão por cavitação.

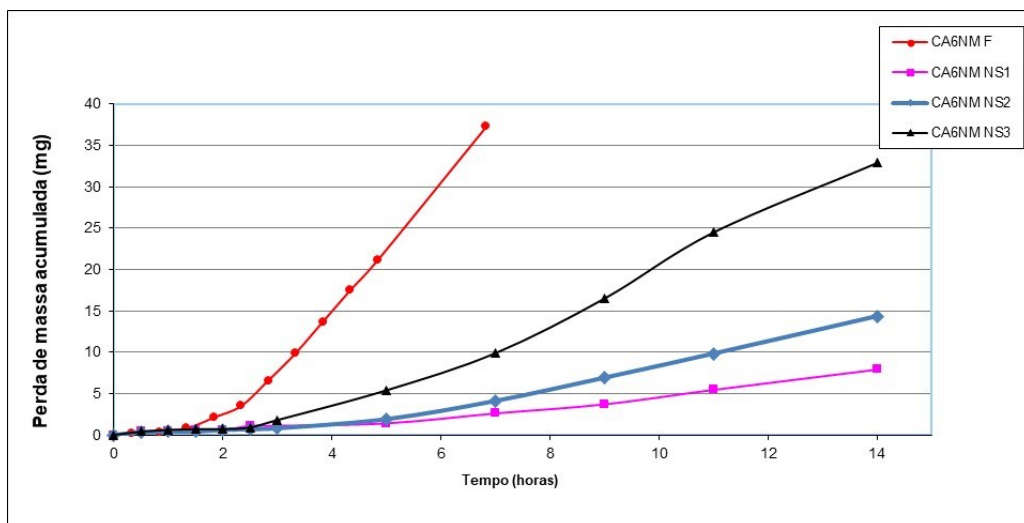

Figura 7: Perda de massa por tempo das amostras do aço CA6NM.

A Tabela 3 apresenta os valores das equações de retas, tempo de incubação e taxa de erosão das amostras ensaiadas nas diferentes condições de tratamento. Como esperado, os tratamentos melhoraram tanto a taxa de erosão como o tempo de incubação. O aço NS1 obteve o melhor desempenho entre os aços estudados, tanto com o maior tempo de incubação quanto com a menor taxa de erosão. O aço NS2 obteve tempo de incubação quase igual ao do aço NS1, porém possui taxa de erosão maior. O aço NS3 apresentou o pior desempenho entre os aços tratados, conforme pode ser verificado pelo menor tempo de incubação e maior taxa de erosão, contudo quando comparado com a condição não tratada (F) verifica-se que o tempo de incubação é igual, mas a taxa de erosão é 4 vezes menor.

**Tabela 3:** Valores das equações de retas, tempo de incubação de taxa de erosão das diferentes condições ensaiadas.

| Condição de tratamento | Equação da reta   | Tempo de incubação (Ti) (h) | Taxa de erosão (TE) (mg/h) |
|------------------------|-------------------|-----------------------------|----------------------------|
| CA6NM - F              | $y = 8,0x - 17,2$ | 2,2                         | 8,0                        |
| CA6NM - NS1            | $y = 0,8x - 3,8$  | 4,6                         | 0,84                       |
| CA6NM - NS2            | $y = 1,5x - 6,6$  | 4,4                         | 1,5                        |
| CA6NM - NS3            | $y = 2,0x - 4,4$  | 2,0                         | 2,0                        |

Na

Figura 8 visualiza-se a superfície erodida por cavitação das amostras tratadas por meio do SHTPN nas condições NS1, NS2 e NS3 após ensaios de cavitação de 1 h (a, b, c), 3 horas (d, e, f) e 14 h (g, h, i). A análise das superfícies erodidas das amostras NS1 a NS3 erodidas por 1 h, permite verificar que o menor dano ocorreu para as amostras tratadas nas NS1 e NS2. Verifica-se também que o dano, ou seja, a deformação inicia principalmente a partir dos contornos das agulhas de martensita (Figura 8-c), porém ainda não é observado arrancamento de material. Liu, [13], verificou que a deformação plástica nos aços martensíticos é restringida pelos seus contornos quando submetidos a erosão por cavitação, o que está de acordo com estes resultados.

Verifica-se também que o resultado da análise das superfícies erodidas está de acordo com o resultado de perda de massa por tempo apresentado na Figura 7. A análise das amostras erodidas por 3 h indicam um aumento da taxa de desgaste em especial para a amostra tratada na condição NS3. Verifica se também que o dano, deformação e remoção de material aumenta no sentido da condição NS1, NS2 e NS3. Outro fator relevante é a identificação de escamação da superfície, principalmente para o aço tratado na condição NS3, indicando o início da perda de massa significativa como também pode ser observado na curva apresentadas na Figura 7.

O aço tratado na condição NS3 também apresenta algumas crateras, confirmando sua pior resistência à erosão por cavitação. A análise das superfícies das amostras tratadas nas condições NS1, NS2 e NS3, erodidas por cavitação por 14 h indicam um estado avançado de erosão. Nesta condição de ensaio não é possível observar nenhum detalhe microestrutural, já que a superfície está totalmente danificada. Mesmo assim, pode-se verificar que a condição NS3 (i) apresenta maior alteração da superfície, representada pelas maiores irregularidades da superfície, consequentemente é a condição que apresentou maior perda de massa durante o ensaio de erosão por cavitação.



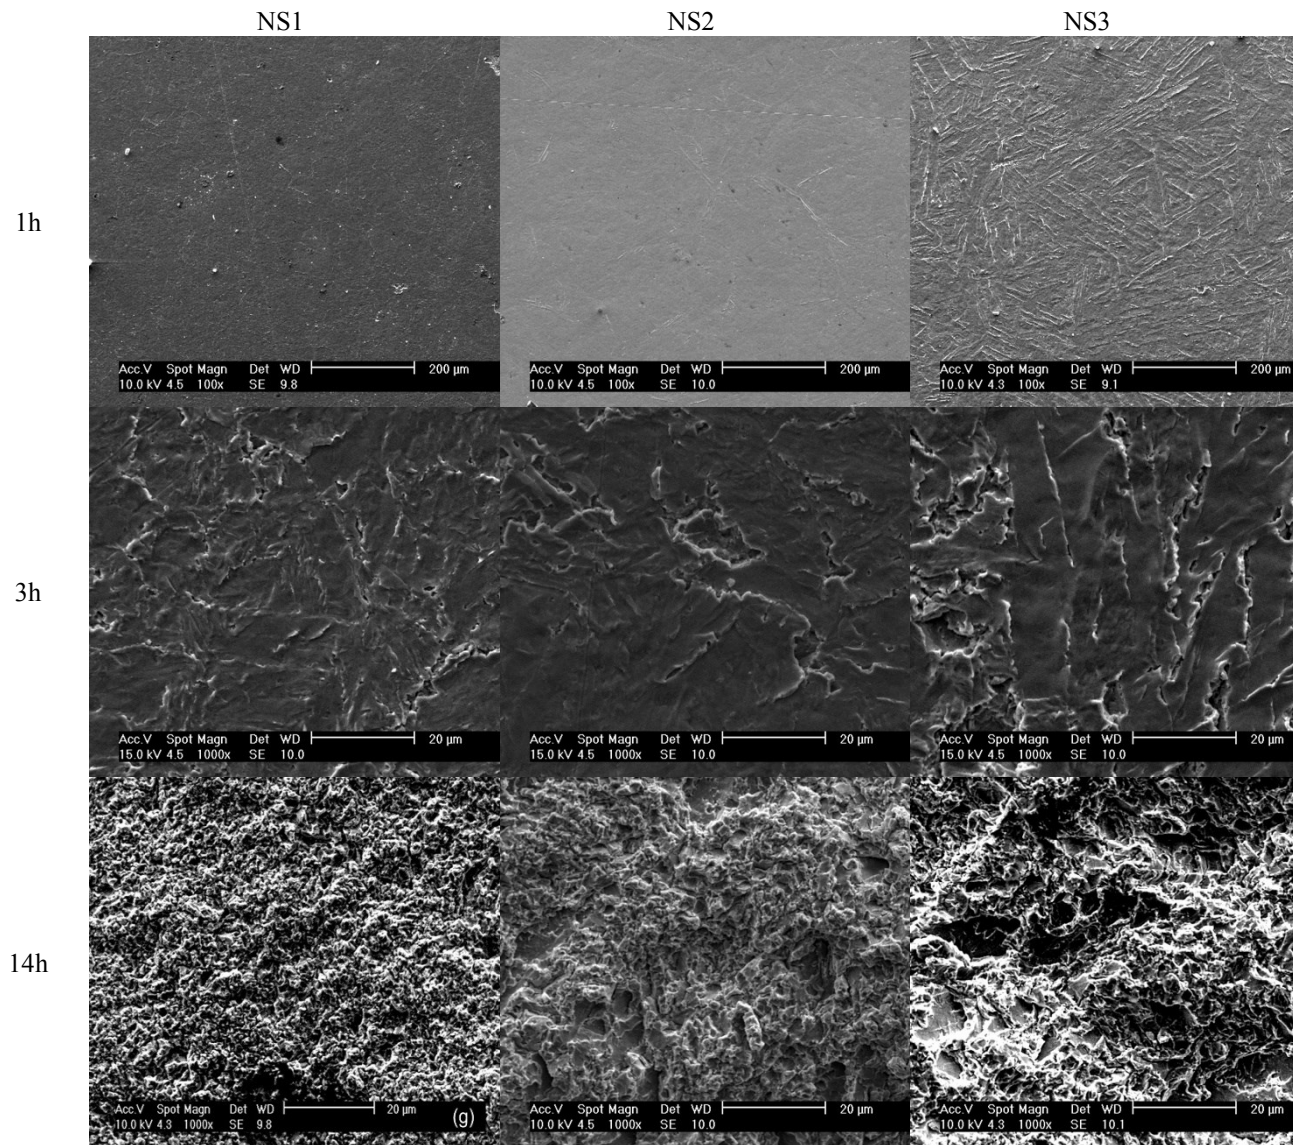

**Figura 8:** Superfícies erodidas das amostras tratadas por SHTPN por meio de ensaio de cavitação: (a) NS1 após 1 h, (b) NS2 após 1 h e (c) NS3 após 1 h, (d) NS1 após 3 h, (e) NS2 após 3 h e (f) NS3 após 3 h, (g) NS1 após 14 h, (h) NS2 após 14 h e (i) NS3 após 14 h.

#### 4. CONCLUSÕES

Neste trabalho foram realizados tratamentos de SHTPN no aço CA6NM com o objetivo de avaliar a resistência à erosão por cavitação.

O nitrogênio adicionado pelo SHTPN nas condições estudadas não foi suficiente para estabilizar grandes quantidades de austenita;

A realização do SHTPN em todas as condições estudadas resultou em acréscimo dos valores de dureza, chegando até 600 HV nas condições NS1 e NS2, indicando presença de nitrogênio dissolvido, assim como em aumento da resistência à erosão por cavitação;

Entre as condições estudadas, a condição NS1 (solubilizada a 1100 °C por 1 h) foi a que obteve maior resistência à erosão por cavitação, apresentando taxa de erosão nove vezes menor que a condição não tratada pelo SHTPN. A melhora foi tanto em maiores tempos de incubação quanto em menores taxas de erosão.

#### 5. AGRADECIMENTOS

Os autores agradecem ao Departamento de Engenharia Mecânica da UFSC, pela ajuda prestada, e à CAPES e ao CNPq pelo financiamento parcial do projeto.

#### 6. BIBLIOGRAFIA

- [1] SIMMONS, J.W. “Overview: high-nitrogen alloying of stainless steels”, *Materials Science and Engineering A*, v. 207, pp. 159-169, 1996.
- [2] GAVRILJUK, V.G., BERNS, H., *High Nitrogen Steels*, Berlin, Springer-Verlag, 1999.
- [3] BAYOUMI, F.M., GHANEM, W.A. “Effect of nitrogen on the corrosion behavior of austenitic stainless steel in chloride solutions”, *Materials Letters*, v. 59, pp.3311– 3314, 2005.
- [4] SUNG J.H., KONG, J.H., YOO, D.K., *et al.*, “Phase changes of the AISI 430 ferritic stainless steels after high-temperature gas nitriding and tempering heat treatment”, *Materials Science and Engineering A*, v. 489, pp. 38–43, 2008.
- [5] SANTOS, J. F., GARZON, C. M., TSCHIPTSCHIN, A. P. “Improvement of the cavitation erosion resistance of an AISI 304L austenitic stainless steel by high temperature gas nitriding”, *Materials Science and Engineering*, v. 382, pp 378–386, 2004.
- [6] REIS, R.F., MALISKA, A.M., BORGES, P.C. “Nitretação a plasma do aço inoxidável austenítico ISO 5832-1: influência do tempo de tratamento”, *Matéria*, v. 13, n. 2, pp. 304 – 315, 2008
- [7] REIS, R. F., MALISKA, A. M., BORGES, P. C., “Nitrogen surface enrichment of austenitic stainless steel ISO 5832-1”, *Journal of Materials Science*, v. 46, pp. 846–854, 2011.
- [8] BORGES, P. C., ROCHA, L. A. “Solution heat treatment of plasma nitrided 15-5PH stainless steel Part I. Improvement of the corrosion resistance”, *Kovove Materialy*, v. 49, pp 107-117 , 2011.
- [9] ASM, 2008 “Failure Analysis and Prevention”, In: ASM Handbook, 5th ed, vol 11, 1002-1017. ASM International Handbook Committee.
- [10] MILLS, D.J., KNUTSEN, R.D. “An investigation of the tribological behaviour of a high-nitrogen Cr-Mn austenitic stainless steel”, *Wear*, v. 215, n.1, pp.83 -90, 1998.
- [11] BREGLIOZZI, G., DI SCHINO, A., HAEFKE, H., *et al.*, “Cavitation erosion resistance of a high nitrogen austenitic stainless steel as a function of its grain size”, *Journal of Materials Science Letters*, v.22, pp. 981– 983, 2003.
- [12] GRAJALES, D. H. M., OSPINA, C. M. G., TSCHIPTSCHIN, A. P. “Avaliação da Resistência ao Desgaste Erosivo Gerado por Cavitação em Aços Inoxidáveis Austeníticos com Alto Teor de Nitrogênio: Estudo dos Mecanismos de Desgaste”, *R. Esc. Minas*, pp.147-152, 2010.
- [13] LIU, W., ZHENG, Y.G., LIU, C.S., *et al.*, “Cavitation erosion behavior of Cr–Mn–N stainless steels in comparison with 0Cr13Ni5Mo stainless steel”, *Wear*, pp.713–722, 2003.
